# Supplementary material for: Comparing estimation techniques for timescale-dependent scaling ofclimate variability in paleoclimate time series
Source: Copernicus journal article supplement (doi:10.5194/npg-2021-7), 2021-03-05
Supplement: Supplementary file 1 [file npg-2021-7-supplement.pdf]

## Contents

|   |                                                        |   |
|---|--------------------------------------------------------|---|
| 1 | Block Average Results                                  | 1 |
| 2 | First-Order Correction for the Effect of Interpolation | 6 |
| 3 | Change in Bias and Standard Deviation                  | 7 |

### 5 1 Block Average Results

Here we show the results of the analysis if block averaging was used to degrade the simulate “annual timeseries” instead of the filtering and sub-sampling method shown as the main result.

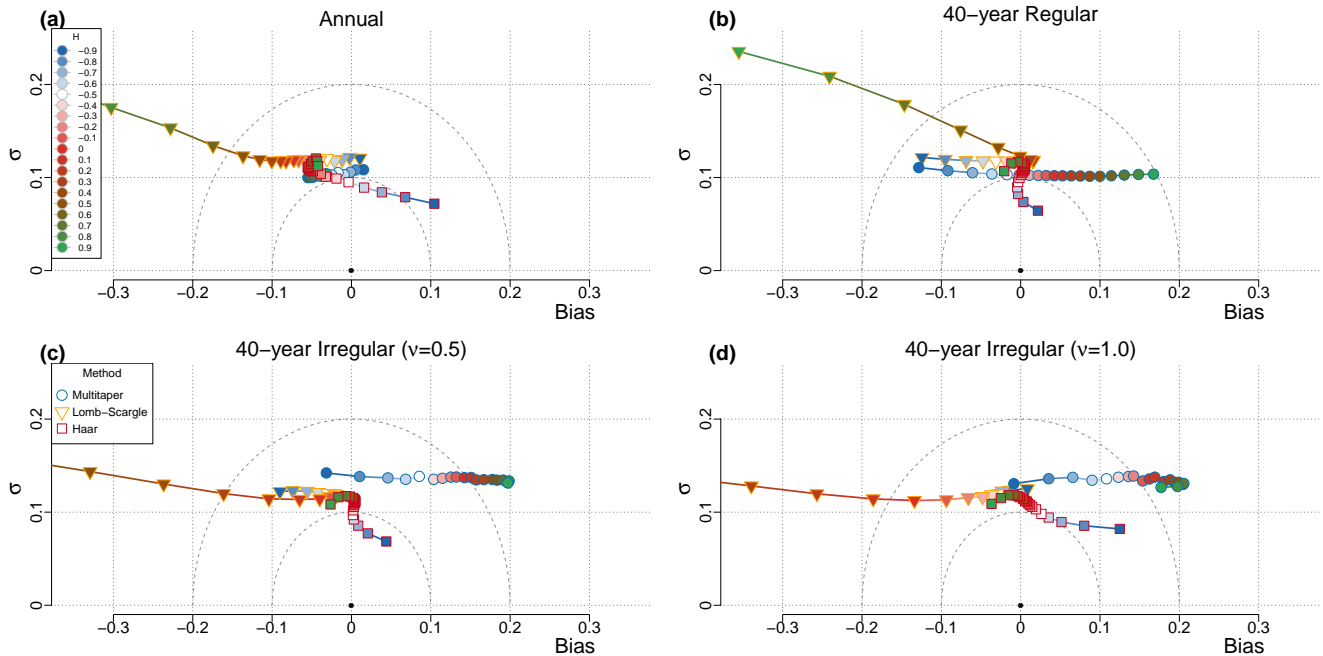

**Figure S1.** Same as Fig. 3, but using block averages to degrade the data rather than the lowpass filtering and subsampling. The performance of the estimators is shown for regular and irregular surrogate data: (a) regular “annual data”, i.e. it was directly simulated and not degraded after, (b) regular surrogate data degraded at regular 40-year interval, and irregular surrogate data with timesteps drawn from a gamma distribution with (c) skewness  $\nu = 0.5$  or (d) skewness  $\nu = 1.0$ .

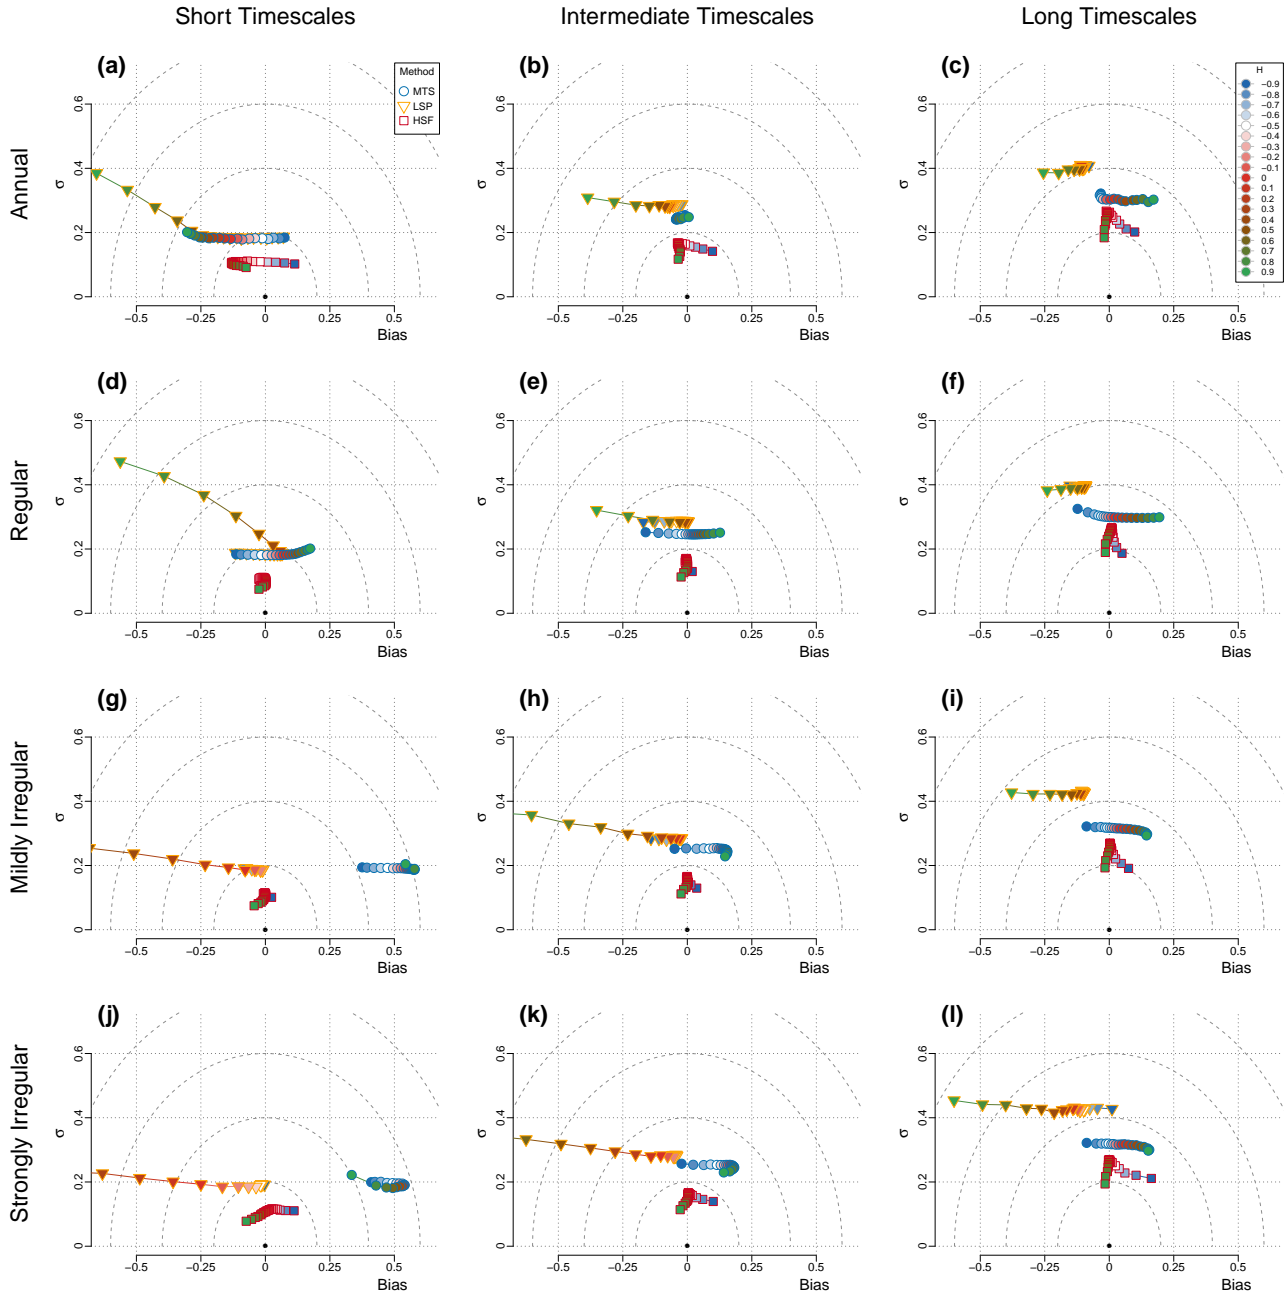

**Figure S2.** Same as Fig. 4, but using block averages to degrade the data rather than the lowpass filtering and subsampling. The timescale dependence of the bias and variance is evaluated for the three methods: MTM (circles), HSF (square), and LSP (triangles). The colors corresponds to the input  $H$  value for each simulation, ranging from  $-0.9$  to  $0.9$ . in increments of  $0.1$ . The rows correspond to different types of surrogate series: **(a-c)** “annual data”, **(d-f)** regular data , **(g-i)** mildly irregular data ( $\nu = 0.5$ ), **(j-l)** strongly irregular data ( $\nu = 1.0$ ); see section 2.2.1. The columns correspond to three different fitting ranges in terms of the mean resolution  $\tau_\mu$ , **(a,d,g,j)** the shorter timescales:  $2-9.2 \tau_\mu$ , **(b,e,h,k)** the intermediate timescales:  $4.3-19.9 \tau_\mu$  and **(c,f,i,l)** the longer timescales:  $9.2-42.7 \tau_\mu$

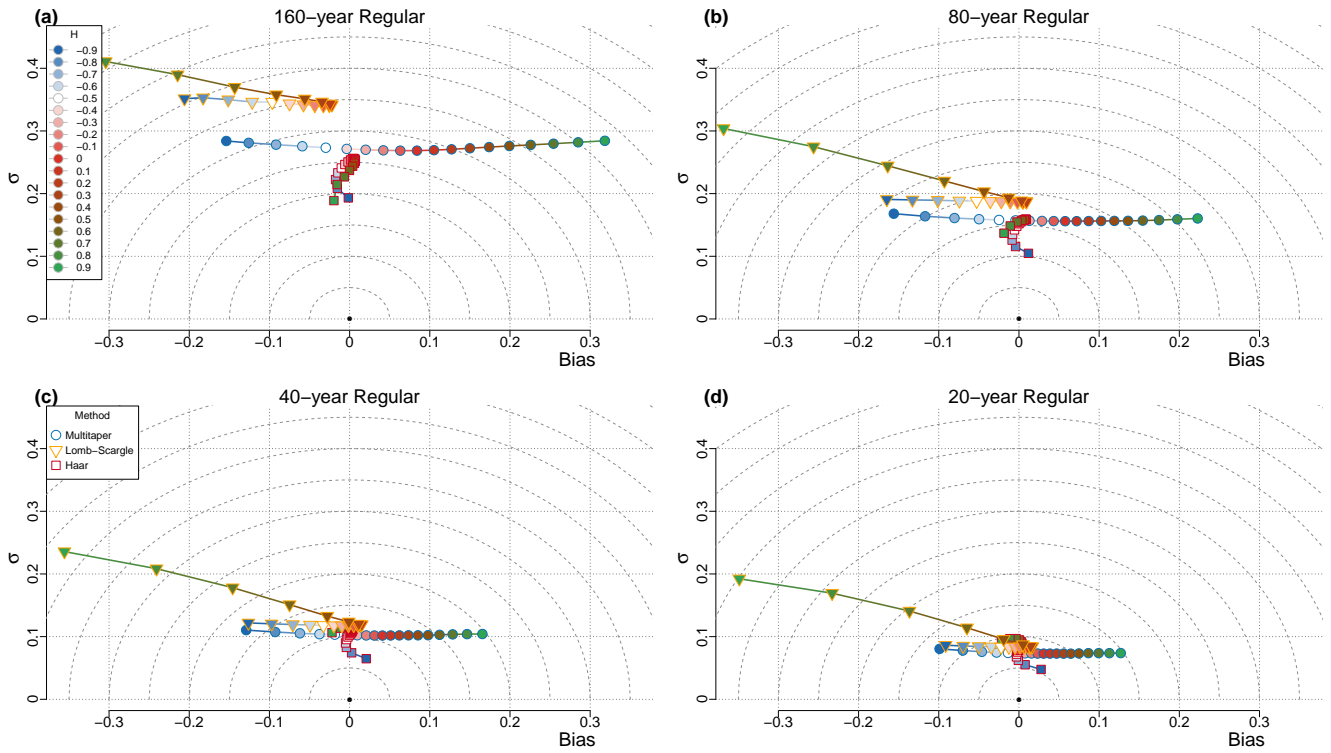

**Figure S3.** Same as Fig. 5, but using block averages to degrade the data rather than the lowpass filtering and subsampling. The performance of the estimators is shown for regular surrogate data of different resolutions: **(a)** 160 years , **(b)** 80 years , **(c)** 40 years and **(d)** 20 years. For each case, the series spanned 5120 years, and therefore each case contains 32, 64, 128 and 256 data points, respectively.

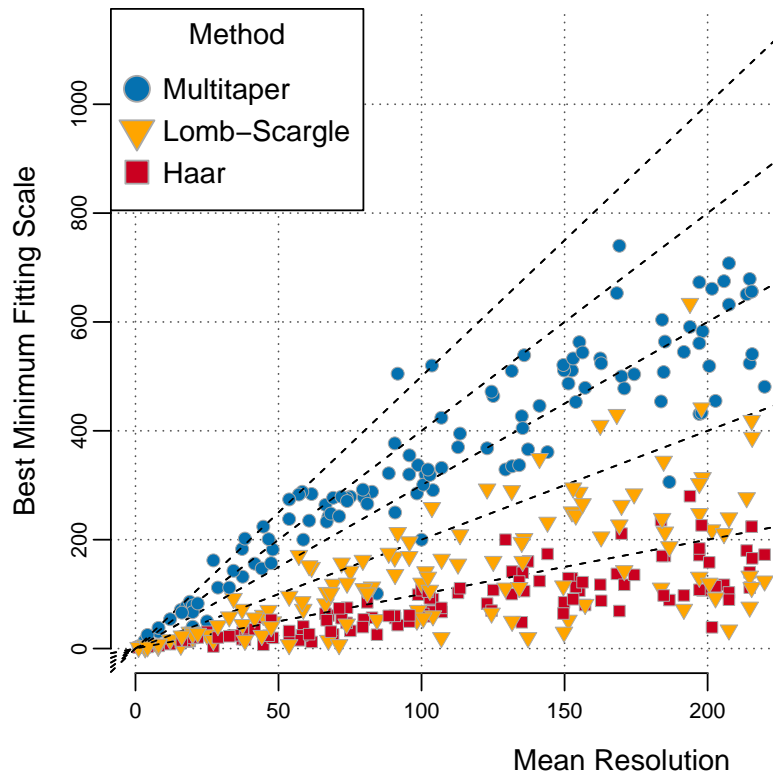

**Figure S4.** Same as Fig. 6, but with block averages rather than the lowpass filtering and subsampling. For each methods are shown the best minimum fitting timescales  $\tau_{min}$  (minimizing the RMSE in  $H$ ) as a function of the mean resolution  $\tau_{\mu}$  for ensembles of surrogate data generated with the same sampling scheme as the corresponding paleoclimate timeseries from the database.

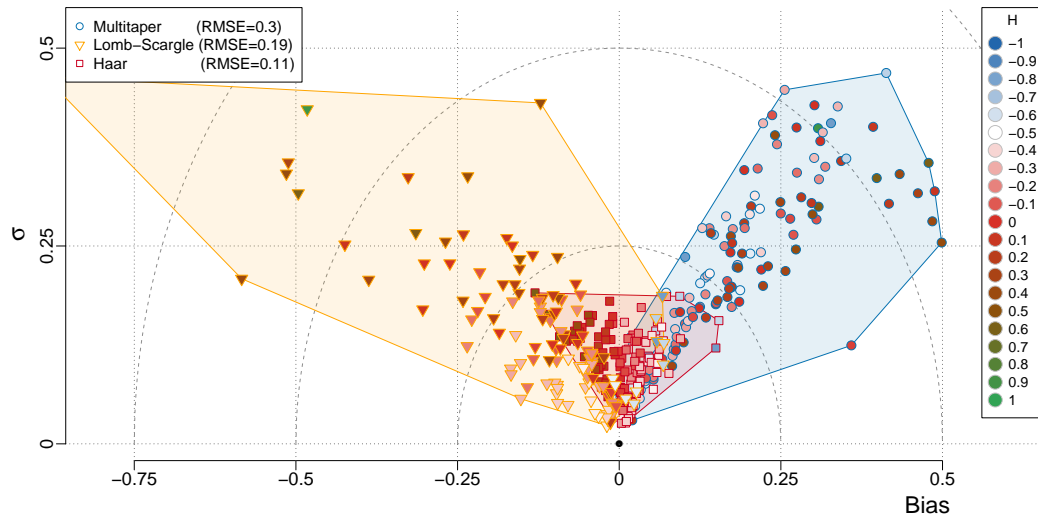

**Figure S5.** Same as Fig. 7, but with block averages rather than the lowpass filtering and subsampling. Bias-standard deviation diagram for the surrogate timeseries generated using timesteps from the paleoclimate database. The input  $H$  used to generate the timeseries is indicated by the colour inside the markers. The shaded polygons contain all the points for a given method (see legend for colours).

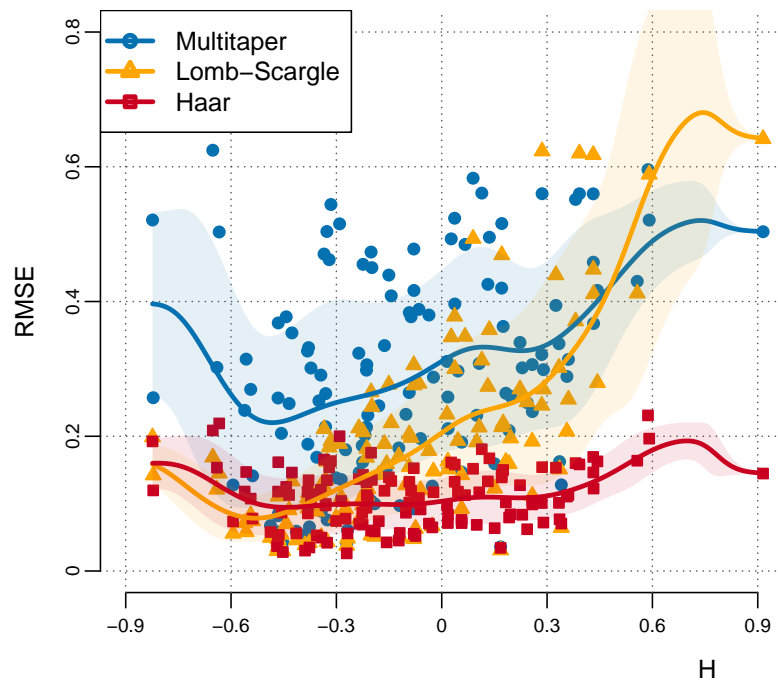

**Figure S6.** Same as Fig 8, but with block averages rather than the lowpass filtering and subsampling. Shown is the RMSE of the  $H$  estimates as a function of the input  $H$  for the surrogate timeseries based on the proxy database. The RMSE are given for the three estimation methods as a function of the  $H$  used to generate the surrogates. Also shown is a Gaussian smoothing of the points for each method (thick line) and the one standard deviation confidence interval (shaded).

## 2 First-Order Correction for the Effect of Interpolation

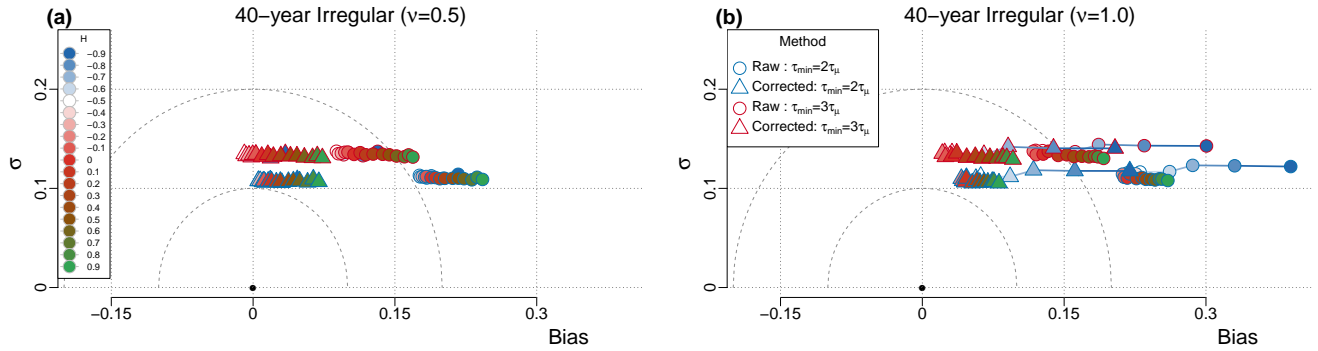

**Figure S7.** Bias-standard deviation diagram comparing the raw MTM estimates as given on Fig. 3 and a corrected version. In the corrected version, we attempted to account to first-order for the effect of the linear interpolation by dividing the estimated power spectra by a  $\text{sinc}^4$  with timescale corresponding to the mean resolution of the irregular series. We show the results for two different minimum fitting timescales  $\tau_{min}$ . This indicates that with such correction we could use the power spectral density estimates down to the Nyquist frequency (corresponding to twice the mean resolution  $\tau_{\mu}$ ) with little bias instead of fitting from thrice the mean resolution as we did on Fig. 3.

### 3 Change in Bias and Standard Deviation

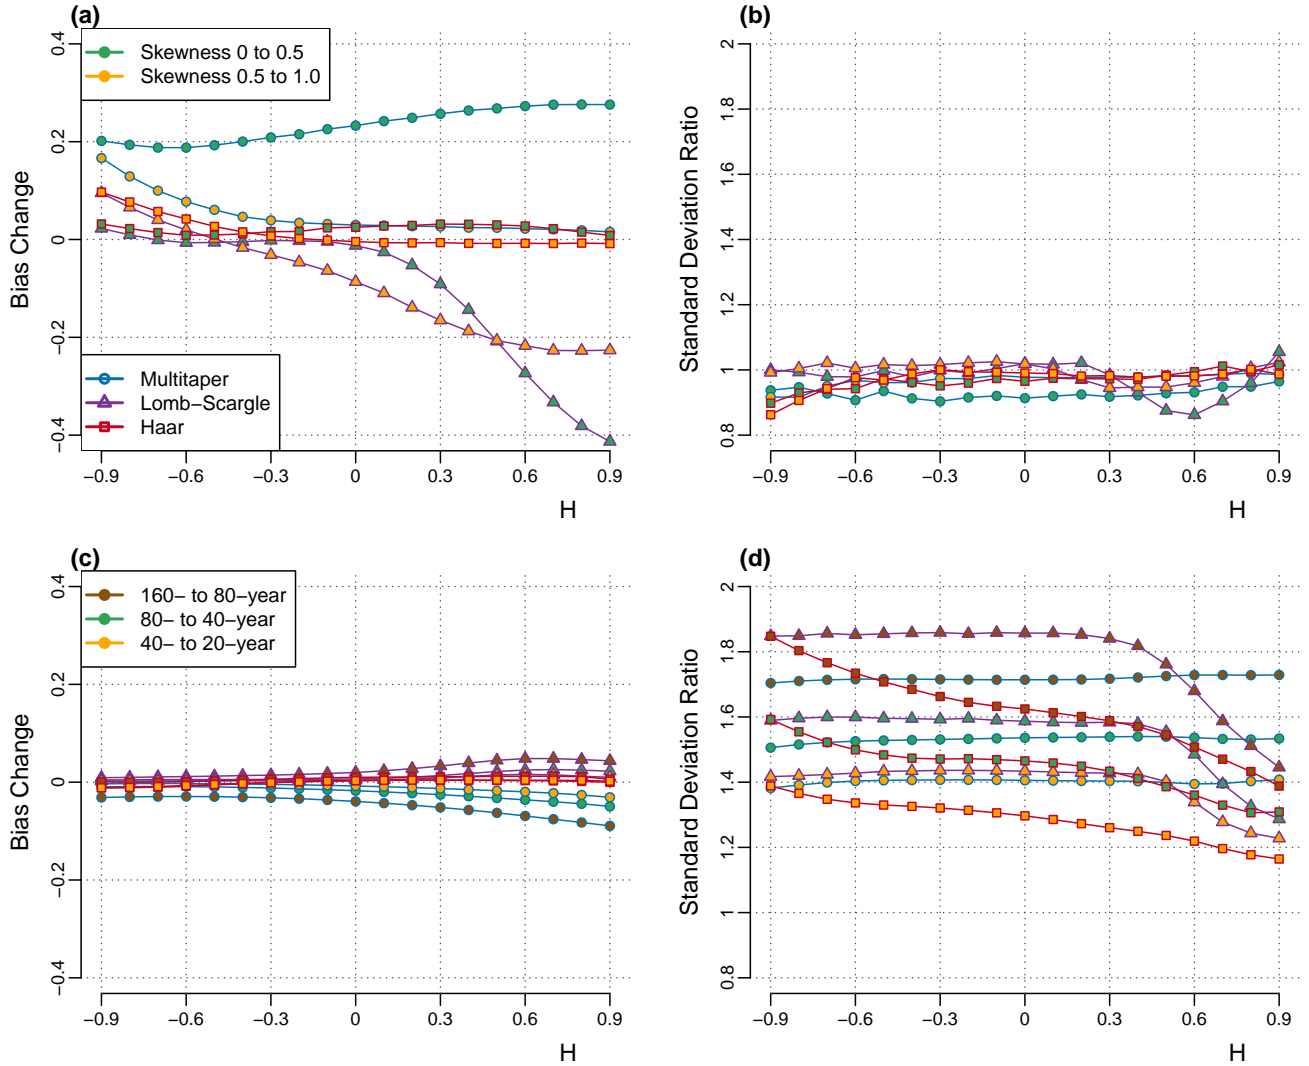

**Figure S8.** (a) The change in bias for the  $H$  estimates of each methods is shown when changing the skewness, from the regular to the mildly irregular case ( $\nu = 0.5$ , yellow), and the mildly irregular case to the strongly irregular case ( $\nu = 1.0$ , green). (b) Same as (a), but instead of the change in bias, it gives the factor by which the standard deviation of the  $H$  estimates decreases for each transition. (c). Same as (a), but for changes in resolution, from 160- to 80- years (yellow), from 80- to 40- years (green) and from 40- to 20- years (brown). (d). Same as (c), but instead of the change in bias, it gives the factor by which the standard deviation of the  $H$  estimates decreases for each of the resolution doublings. Overall, we notice that increase the skewness affects mostly the bias, whereas changing the resolution mostly affects the standard deviation of the estimates.
